# Supplementary material for: Generation of Thyroid Tissues From Embryonic Stem Cells via Blastocyst Complementation In Vivo
Source: PubMed Central journal article supplement (PMC7767966; doi:10.3389/fendo.2020.609697), 2020-12-14
Supplement: DataSheet_1.pdf [file DataSheet_1.pdf]

**Supplemental video 1. Continuous hematoxylin and eosin staining of serial sections of the thyroid gland of an *Fgf10* Ex1<sup>wild</sup>/Ex3<sup>wild</sup> neonate.**

**Supplemental video 2. Continuous hematoxylin and eosin staining of serial sections of the thyroid gland of an *Fgf10* Ex1<sup>mut</sup>/Ex3<sup>mut</sup> neonate with severe thyroid hypoplasia.**

**Supplemental video 3. Continuous hematoxylin and eosin staining of serial sections of the thyroid gland of an *Fgf10* Ex1<sup>mut</sup>/Ex3<sup>mut</sup> chimeric neonate complemented with embryonic stem cells.**
